# Supplementary material for: Refining the Results of a Classical SELEX Experiment by Expanding the Sequence Data Set of an Aptamer Pool Selected for Protein A
Source: MDPI journal article supplement (doi:10.3390/ijms19020642), 2018-02-24
Supplement: s1 [file s1]

**Table S1.** Groups with ≥15 homologous sequences, which were identified by data analysis of the NGS pool using the two-step clustering and alignment method. Each group consists of a different number of clusters (containing identical sequences) and singletons (unique sequences also called orphans). All grouped sequences are listed.

| group<br>(size ≥15 seq.) | non-redundant NGS pool (1. clustering) |       | no. seq. | aptameric sequence (5' → 3')<br>ATACCAGCTTATTCAATT ---- intern region ---- ACAATCGTAATCAGTTAG | length of<br>intern region<br>(nt) | aptamer from<br>Sanger pool<br>identified | new<br>aptamer |
|--------------------------|----------------------------------------|-------|----------|-----------------------------------------------------------------------------------------------|------------------------------------|-------------------------------------------|----------------|
|                          | cluster or<br>singleton                | name  |          |                                                                                               |                                    |                                           |                |
| group 1                  | * cluster                              | C1    | 54       | AGCAACATGAGGGGGATAGAGGGGTGGGTTCTCTCGGCT                                                       | 40                                 | PA#2/8                                    | PA-C4<br>PA-C7 |
|                          | cluster                                | C4    | 41       | AGCAACATGAGGGGGATGAGGGGGTGGGTTCTCTCGGCT                                                       | 40                                 |                                           |                |
|                          | cluster                                | C7    | 25       | AGCAACATGAGGGGGATAGAGGGGTGGGTTCTCTCGGCT                                                       | 41                                 |                                           |                |
|                          | cluster                                | C23   | 11       | AGCAACATNAGGGGGATNAGGGGTGGGTTCTCTCGGCT                                                        | 41                                 |                                           |                |
|                          | cluster                                | C31   | 8        | AGCAACATNAGGGGGATNAGGGGTGGGTTCTCTCGGCT                                                        | 42                                 |                                           |                |
|                          | cluster                                | C34   | 8        | AGCAACATNAGGGGGATGAGGGGTGGGTTCTCTCGGCT                                                        | 40                                 |                                           |                |
|                          | cluster                                | C41   | 7        | AGCAACATGAGGGGGATAGAGGGGTGGGTTCTCTCGGCT                                                       | 43                                 |                                           |                |
|                          | cluster                                | C54   | 6        | AGCAACATNAGGGGGATAGAGGGGTGGGTTCTCTCGGCT                                                       | 41                                 |                                           |                |
|                          | cluster                                | C55   | 6        | AGCAACATGAGGGGGATGAGGGGTGGGTTCTCTCGGCT                                                        | 41                                 |                                           |                |
|                          | cluster                                | C64   | 5        | AGCAACATNAGGGGGATGAGGGGTGGGTTCTCTCGGCT                                                        | 41                                 |                                           |                |
|                          | cluster                                | C67   | 5        | AGCAACATNAGGGGGATNAGGGGTGGGTTCTCTCGGCT                                                        | 40                                 |                                           |                |
|                          | cluster                                | C104  | 4        | AGCAACATGAGGGGGATAGAGGGGTGGGTTCTCTCGGTT                                                       | 40                                 |                                           |                |
|                          | cluster                                | C139  | 3        | AGCAACATGAGGGGGATAGAGGGGTGGGTTCTCTCGACT                                                       | 40                                 |                                           |                |
|                          | cluster                                | C152  | 2        | AGCAACATGAGGGGGATGAGGGGTGGGTTCTCTCGGCT                                                        | 42                                 |                                           |                |
|                          | cluster                                | C154  | 2        | AGCAACATGAGGGGGATAGAGGGGTGGGTTCTCTCGGCT                                                       | 42                                 |                                           |                |
|                          | cluster                                | C189  | 2        | AGCAACATGAGGGGGATAGAGGGGTGGGTTCTCTCGTCT                                                       | 40                                 |                                           |                |
|                          | cluster                                | C207  | 2        | AGCAACATGAGGGGGATGAAGGGGTGGGTTCTCTCGGCT                                                       | 40                                 |                                           |                |
|                          | cluster                                | C240  | 2        | AGCAACATGAGGGGGATGAGGGGTGGGTTCTCTCGACT                                                        | 40                                 |                                           |                |
|                          | cluster                                | C269  | 2        | AGCAACATGAGGGGGATAGAGGGGTGGGTTCTCTCGGCT                                                       | 39                                 |                                           |                |
|                          | cluster                                | C272  | 2        | AGCAACATGAGGGGGATGAGGGGTGGGTTCTCTCGGCT                                                        | 39                                 |                                           |                |
|                          | singleton                              | S292  | 1        | AGCAACATNAGGGGGGATNAGGGGGGTGGGTTCTCTCGGCT                                                     | 45                                 |                                           |                |
|                          | singleton                              | S298  | 1        | AGCAACATGAGGGGGGATAGAGGGGGGTGGGTTCTCTCGTCT                                                    | 44                                 |                                           |                |
|                          | singleton                              | S301  | 1        | AGCAACATGAGGGGGGATAGAGGGGGGTGGGTTCTCTCGGCT                                                    | 44                                 |                                           |                |
|                          | singleton                              | S302  | 1        | AGCTAACGATGACGGGGGATGAGGGGGTGGGTTCTCTCGGCTA                                                   | 44                                 |                                           |                |
|                          | singleton                              | S309  | 1        | AGCAACATGAGGGGGATAGAGGGGGGTGGGTTCTCTCGGCT                                                     | 43                                 |                                           |                |
|                          | singleton                              | S310  | 1        | AGCAACATGAGGGGGGATAGAGGGGGGTGGGTTCTCTCGGCC                                                    | 43                                 |                                           |                |
|                          | singleton                              | S313  | 1        | TAGCAACATNAGGGGGGATNAGGGGGGTGGGTTCTCTCGGCT                                                    | 43                                 |                                           |                |
|                          | singleton                              | S314  | 1        | AGCAACATGAGGGGGGATAGAGGGGGGTGGGTTCTCTCGGCT                                                    | 43                                 |                                           |                |
|                          | singleton                              | S316  | 1        | AGCAACATNAGGGGGGATNAGGGGGGTGGGTTCTCTCGGCT                                                     | 42                                 |                                           |                |
|                          | singleton                              | S321  | 1        | AGCAACAATGAGGGGGGATGAGGGGGGTGGGTTCTCTCGGCT                                                    | 42                                 |                                           |                |
|                          | singleton                              | S326  | 1        | AGCAACATNAGGGGGGATNAGGGGGGTGGGTTCTCTCGTCT                                                     | 42                                 |                                           |                |
|                          | singleton                              | S330  | 1        | AGCAACATAGAGGGGGATAGAGGGGTGGGTTCTCTCGGACT                                                     | 42                                 |                                           |                |
|                          | singleton                              | S334  | 1        | AGCAACATGAGGGGGGATGAGGGGGGTGGGTTCTCTTGCT                                                      | 42                                 |                                           |                |
|                          | singleton                              | S336  | 1        | AGCAACATNAGGGGGGATAGAGGGGGGTGGGTTCTCTCGGCT                                                    | 42                                 |                                           |                |
|                          | singleton                              | S339  | 1        | AGCAACATGAGGGGGGATAGAGGGGGGTGGGTTCTCTCGGCT                                                    | 42                                 |                                           |                |
|                          | singleton                              | S346  | 1        | AGCAACATGAGGGGGATAGAGGGGGGTGGGTTCTCTCGGCT                                                     | 42                                 |                                           |                |
|                          | singleton                              | S355  | 1        | AGCAACATNAGGGGGGATGAGGGGGGTGGGTTCTCTCGGCC                                                     | 41                                 |                                           |                |
|                          | singleton                              | S359  | 1        | CGCAACATGAGGGGGGATAGAGGGGGGTGGGTTCTCTCGGCT                                                    | 41                                 |                                           |                |
|                          | singleton                              | S360  | 1        | AGCAACATGAGGGGGGATAGGGGGGGTGGGTTCTCTCGGCT                                                     | 41                                 |                                           |                |
|                          | singleton                              | S367  | 1        | AGCAACATGAGGGGGGATAAGGGGGGTGGGTTCTCTCGGCT                                                     | 41                                 |                                           |                |
|                          | singleton                              | S368  | 1        | AGCAACATNAGGGGGGATNAGGGGGGTGGGTTCTCTCGTCT                                                     | 41                                 |                                           |                |
|                          | singleton                              | S389  | 1        | AGCAACATGAGGGGGATGAGGGGGGTGGGTTCTCTCGGCT                                                      | 41                                 |                                           |                |
|                          | singleton                              | S397  | 1        | AGCAACATGAGGGGGATAGAGGGGGGTGGGTTCTCTCGGCT                                                     | 41                                 |                                           |                |
|                          | singleton                              | S405  | 1        | AGCAACATNAGGGGGGATNAGGGGGGTGGGTTCTCTCGACT                                                     | 41                                 |                                           |                |
|                          | singleton                              | S406  | 1        | AGCAACATGAGGGGGGATAGAGGGGGGTGGGTTCTCTCGGTT                                                    | 41                                 |                                           |                |
|                          | singleton                              | S412  | 1        | AGCAACATGAGGGGGGATAGAGGGGGGTGGGTTCTCTTGCT                                                     | 41                                 |                                           |                |
|                          | singleton                              | S421  | 1        | AGCAACATNAGGGGGGATAAGGGGGGTGGGTTCTCTCGGCT                                                     | 41                                 |                                           |                |
|                          | singleton                              | S423  | 1        | AGCAACATGAGGGGGGATGAGGGGGGTGGGTTCTCTCGGCT                                                     | 41                                 |                                           |                |
|                          | singleton                              | S437  | 1        | AGCAACATGAGGGGGATAGAGGGGGGTGGGTTCTCTCGGCT                                                     | 41                                 |                                           |                |
|                          | singleton                              | S442  | 1        | AGCAACATGAGGGGGATAGAGGGGGGTGGGTTCTCTCGACT                                                     | 41                                 |                                           |                |
|                          | singleton                              | S451  | 1        | AGCAACATGAGGGGGATAGAGGGGGGTGGGTTCTCTCGGCT                                                     | 41                                 |                                           |                |
|                          | singleton                              | S455  | 1        | AGCAACATGAGGGGGGATAGAGGGGGGTGGGTTCTCTCGACT                                                    | 41                                 |                                           |                |
|                          | singleton                              | S464  | 1        | GGCAACATGAGGGGGATAGAGGGGGGTGGGTTACTCTCAGCT                                                    | 41                                 |                                           |                |
|                          | singleton                              | S489  | 1        | AGCAACATNAGGGGGATGAGGGGGGTGGGTTCTCTCGGCT                                                      | 40                                 |                                           |                |
|                          | singleton                              | S557  | 1        | AGCAACATGAGGGGGATGAGGGGGGTGGGTTCTCTGGCT                                                       | 40                                 |                                           |                |
|                          | singleton                              | S763  | 1        | AGCAACATNAGGGGGGATAAGGGGGGTGGGTTCTCTCGGCT                                                     | 40                                 |                                           |                |
|                          | singleton                              | S1010 | 1        | AGCAACATNAGGGGGGATAAGGGGGGTGGGTTCTCTCAGCT                                                     | 40                                 |                                           |                |
|                          | singleton                              | S1034 | 1        | AGCAACATGAGGGGGATGAGGGGGGTGGGTTCTCTTGCT                                                       | 40                                 |                                           |                |
|                          | singleton                              | S1047 | 1        | AGCAACATGAGGGGGATGAGGGGGGTGGGTTCTCTCGGCC                                                      | 40                                 |                                           |                |
|                          | singleton                              | S1060 | 1        | AGCAACATGAGGGGGATGAGGGGGGTGGGTTCTCTCGGTT                                                      | 40                                 |                                           |                |
|                          | singleton                              | S1064 | 1        | AGCAACATGAGGGGGATTGAGGGGGGTGGGTTCTCTCGGCT                                                     | 40                                 |                                           |                |
|                          | singleton                              | S1268 | 1        | AGCAACATNAGGGGGATGAGGGGGGNGGGTTTCTCGGCT                                                       | 39                                 |                                           |                |
|                          | singleton                              | S1270 | 1        | AGCAACATGAGGGGGATAGAGGGGGGTGGGTTCTCTCGGCT                                                     | 39                                 |                                           |                |
|                          | singleton                              | S1312 | 1        | AGCAACATGAGGGGGATGAGGGGGGTGGGTTCTCTCGGCT                                                      | 39                                 |                                           |                |
|                          | singleton                              | S1328 | 1        | AGCAACATGAGGGGGATGAGGGGGGTGGGTTCTCTCGTCT                                                      | 39                                 |                                           |                |
|                          | singleton                              | S1329 | 1        | AGCAACATNAGGGGNTAAGGGGGNGGGTTCTCTCGGCT                                                        | 39                                 |                                           |                |
|                          | singleton                              | S1352 | 1        | AGCAACATNAGGGGGATGAGGGGGGTGGGTTCTCTCGACT                                                      | 39                                 |                                           |                |
|                          | singleton                              | S1386 | 1        | AGCAACATGAGGGGGATAGAGGGGGTGGTCTCTCGGCT                                                        | 38                                 |                                           |                |
|                          | singleton                              | S1387 | 1        | AGCAACATNAGGGGGATGAGGGGGTGGTCTCTCGGCT                                                         | 38                                 |                                           |                |
|                          | singleton                              | S1416 | 1        | AGCAACATGAGGGGGATAGAGGGGGTGGTCTCTCGGCT                                                        | 37                                 |                                           |                |
| group 2                  | * cluster                              | C10   | 20       | GCGCACCACGGGAGTTGGCCACATTTGGAGTTGTTTTGTC                                                      | 40                                 | PA#14/89                                  | PA-C10         |
|                          | cluster                                | C21   | 12       | GCGCACCACGGGAGTCGGCCACATTTGGAGTTGTTTTGTC                                                      | 40                                 |                                           |                |
|                          | cluster                                | C51   | 7        | GCGCACCACGGGAGTTGGCCACATTTGGAGTTGTTTTGTC                                                      | 39                                 |                                           |                |
|                          | cluster                                | C52   | 7        | GCGCACCACGGGAGTCGGCCACATTTGGAGTTGTTTTGTC                                                      | 39                                 |                                           |                |
|                          | cluster                                | C60   | 6        | GGGCACCACGGGAGTCGGCCACATTTGGAGTTGTTTTGTC                                                      | 40                                 |                                           |                |
|                          | cluster                                | C77   | 5        | GGGCACCACGGGAGTCGGCCACATTTGGAGTTGTTTTGTC                                                      | 39                                 |                                           |                |
|                          | cluster                                | C86   | 4        | GTGCACCACGGGAGTTGGCCACATTTGGAGTTGTTTTGTC                                                      | 40                                 |                                           |                |
|                          | cluster                                | C99   | 4        | GGGCACCACGGGAGTTGGCCACATTTGGAGTTGTTTTGTC                                                      | 40                                 |                                           |                |
|                          | cluster                                | C142  | 3        | GTGCACCACGGGAGTCGGCCACATTTGGAGTTGTTTTGTC                                                      | 40                                 |                                           |                |
|                          | cluster                                | C156  | 2        | GCGCACCACGGGAGTCGGCCACATTTGGAGTTGTTTTGTC                                                      | 41                                 |                                           |                |
|                          | cluster                                | C187  | 2        | GGGCACCACGGGAGTCGGCCACATTTGGAGTTGTTTTGTC                                                      | 40                                 |                                           |                |
|                          | cluster                                | C280  | 2        | GCGCACCACGGGAGTCGGCCACATTTGGAGTTGTTTTGTC                                                      | 39                                 |                                           |                |
|                          | singleton                              | S333  | 1        | GCGCACCACGGGAGTCGGCCACATTTGGAGTTGTTTTGTC                                                      | 42                                 |                                           |                |
|                          | singleton                              | S401  | 1        | GCGCACCACGGGAGTTGGCCACATTTGGAGTTGTTTTGTC                                                      | 41                                 |                                           |                |
|                          | singleton                              | S428  | 1        | GCGCACCACGGGAGTCGGCCACATTTGGAGTTGTTTTGTC                                                      | 41                                 |                                           |                |
|                          | singleton                              | S449  | 1        | GCGCACCACGGGAGTCGGCCACATTTGGAGTTGTTTTGTC                                                      | 41                                 |                                           |                |
|                          | singleton                              | S481  | 1        | GCGCACCACGGGAGTTGGCCACATTTGGAGTTGTTTTGTC                                                      | 40                                 |                                           |                |
|                          | singleton                              | S581  | 1        | GCGCACCACGGGAGTTGGCCACATTTGGAGTTGTTTTGTC                                                      | 40                                 |                                           |                |
|                          | singleton                              | S894  | 1        | GGGGCACCACGGGAGTCGGCCACATTTGGAGTTGTTTTGTC                                                     | 40                                 |                                           |                |
|                          | singleton                              | S916  | 1        | GGGCACCACAGGAGTCGGCCACATTTGGAGTTGTTTTGTC                                                      | 40                                 |                                           |                |
|                          | singleton                              | S1125 | 1        | ACGCACCACGGGAGTTGGCCACATTTGGAGTTGTTTTGTC                                                      | 40                                 |                                           |                |
|                          | singleton                              | S1281 | 1        | GCGCACCACGGGAGTTGGCCACATTTGGAGTTGTTTTGTC                                                      | 39                                 |                                           |                |
|                          | singleton                              | S1314 | 1        | GTGCACCACGGGAGTTGGCCACATTTGGAGTTGTTTTGTC                                                      | 39                                 |                                           |                |

| group<br>(size ≥15 seq.) | non-redundant NGS pool (1. clustering) |       |          | aptameric sequence (5' → 3')                                   | length of<br>intern region<br>(nt) | aptamer from<br>Sanger pool<br>identified | new<br>aptamer |
|--------------------------|----------------------------------------|-------|----------|----------------------------------------------------------------|------------------------------------|-------------------------------------------|----------------|
|                          | cluster or<br>singleton                | name  | no. seq. |                                                                |                                    |                                           |                |
|                          |                                        |       |          | ATACCAGCTTATTC AATT ---- intern region ---- ACAATCGTAATCAGTTAG |                                    |                                           |                |
| group 3                  |                                        |       |          |                                                                |                                    |                                           |                |
|                          | * cluster                              | C3    | 48       | GCAGTACTGATGAGTGTAGCCGTATGATTATCGTTTGTGG                       | 40                                 | PA#4/22                                   |                |
|                          | cluster                                | C12   | 17       | GCAGTACTGATGAGTGTAGCCGTATGATTANCGTTTGTGG                       | 40                                 |                                           |                |
|                          | cluster                                | C229  | 2        | GCAGTACTGATGAGTGTAGCCGTATGATTATCGTTTGTGC                       | 40                                 |                                           |                |
|                          | cluster                                | C238  | 2        | GTAGTACTGATGAGTGTAGCCGTATGATTATCGTTTGTGG                       | 40                                 |                                           |                |
|                          | singleton                              | S327  | 1        | GCGAGTACTGATGAGTGTAGCCGTATGATTACTCGTTTGTGG                     | 42                                 |                                           |                |
|                          | singleton                              | S383  | 1        | GCAGTACTGATGAGTGTAGCCGTATGATTATCGTTTGTCCG                      | 41                                 |                                           |                |
|                          | singleton                              | S462  | 1        | GCAGTACTGATGAGTGTAGCCGTATGATTATCGTTTGTGG                       | 41                                 |                                           |                |
|                          | singleton                              | S522  | 1        | GCAGTACTGATGAATGTAGCCGTATGATTATCGTTTGTGG                       | 40                                 |                                           |                |
|                          | singleton                              | S624  | 1        | GGAGTACTGATGAGTGTAGCCGTATGATTATCGTTTGTGG                       | 40                                 |                                           |                |
|                          | singleton                              | S743  | 1        | GCAGTACTGATGAGTGTAGCCGTATGATTANCGTTTGTGC                       | 40                                 |                                           |                |
|                          | singleton                              | S1303 | 1        | GCAGTACTGATGAGTGTAGCCGTATGATTANCGTTTNTG                        | 39                                 |                                           |                |
| group 4                  |                                        |       |          |                                                                |                                    |                                           |                |
|                          | * cluster                              | C0    | 56       | CCCCAACGAGTCGATATGTAGCCACACTCTGATTCTGCTCC                      | 40                                 | PA#4/34                                   |                |
|                          | cluster                                | C57   | 6        | ACCCAACGAGTCGATATGTAGCCACACTCTGATTCTGCTCC                      | 40                                 |                                           |                |
|                          | singleton                              | S297  | 1        | CCCCAACGAGTCGATAATGTAGCCACACGCTCTGATTCTGCTCA                   | 44                                 |                                           |                |
|                          | singleton                              | S651  | 1        | CCCTAACGAGTCGATATGTAGCCACACTCTGATTCTGCTCC                      | 40                                 |                                           |                |
|                          | singleton                              | S782  | 1        | CCCCAATGAGTCGATATGTAGCCACACTCTGATTCTGCTCC                      | 40                                 |                                           |                |
|                          | singleton                              | S815  | 1        | CCCCAACGAGTCGATATGTAGCTCACACTCTGATTCTGCTCC                     | 40                                 |                                           |                |
|                          | singleton                              | S967  | 1        | CCCCAACGAGTCGATATGTAGCCACACTCTGATTCTGTAC                       | 40                                 |                                           |                |
|                          | singleton                              | S1004 | 1        | GCACAACGAGTCGATATGTAGCCACACTCTGATTCTGCTCC                      | 40                                 |                                           |                |
|                          | singleton                              | S1172 | 1        | CCCCAACGAGTCGATATGTAGCCACACTCTGATTCTGCCCC                      | 40                                 |                                           |                |
|                          | singleton                              | S1304 | 1        | CCCAACGAGTCGATATGTAGCCACACTCTGATTCTGCTCC                       | 39                                 |                                           |                |
| group 5                  |                                        |       |          |                                                                |                                    |                                           |                |
|                          | * cluster                              | C2    | 52       | GGAGACGACAAACTATTACGTACTACGGCATGCACCTTGGT                      | 40                                 | PA#2/11                                   |                |
|                          | singleton                              | S578  | 1        | GGAGACGACAAACTATTACGTACTACGGTATGCACCTTGGT                      | 40                                 |                                           |                |
|                          | singleton                              | S738  | 1        | GGAGACGACAAACTATTACGTACTACGGCATGCACCTTGGT                      | 40                                 |                                           |                |
|                          | singleton                              | S742  | 1        | GCAGACGACAAACTATTACGTACTACGGCATGCACCTTGGT                      | 40                                 |                                           |                |
|                          | singleton                              | S927  | 1        | GGAGACGACAAACTATTACGTACTACGGCATACACTTGGT                       | 40                                 |                                           |                |
|                          | singleton                              | S1185 | 1        | GTAGACGACAAACTATTACGTACTACGGCATGCACCTTGGT                      | 40                                 |                                           |                |
| group 6                  |                                        |       |          |                                                                |                                    |                                           |                |
|                          | * cluster                              | C8    | 22       | AGGCCAGATGAGGGGTGCCATGCGGGGTGGCTGCTCCA                         | 40                                 |                                           | PA-C8          |
|                          | cluster                                | C61   | 6        | AGGCCAGATGAGGGGTGCCATGCGGGGTGGCTGCTCCA                         | 40                                 |                                           |                |
|                          | cluster                                | C108  | 4        | AGGCCAGATGAGGGGTGCCATGCGGGTGGCTGCTCCA                          | 38                                 |                                           |                |
|                          | cluster                                | C151  | 3        | AGGCCAGATGAGGGGTGCCATGCGGGGTGGCTGCTCCA                         | 39                                 |                                           |                |
|                          | cluster                                | C282  | 2        | AGGCCAGATNAGGGGTGCCATGCGGGTGGCTGCTCC                           | 37                                 |                                           |                |
|                          | cluster                                | C284  | 2        | AGGCCAGATGAGGGGTGCCATGCGGGTGGCTGCTCCA                          | 37                                 |                                           |                |
|                          | singleton                              | S311  | 1        | AGGCCAGATGAGGGGTGCCATGCGGGGTGGGTGCTCCA                         | 43                                 |                                           |                |
|                          | singleton                              | S534  | 1        | AGGCCAGATGAGGGGTGCCATGCGGGGTGGCTGCTCCA                         | 40                                 |                                           |                |
|                          | singleton                              | S1372 | 1        | AGGCCAGATGAGGGGTGCCATGCGGGGTGGCTGCTCCA                         | 39                                 |                                           |                |
|                          | singleton                              | S1395 | 1        | AGGCCAGATNAGGGGTGCCATGCGGGTGGCTGCTCCA                          | 38                                 |                                           |                |
|                          | singleton                              | S1408 | 1        | AGGCCAGATGAGGGGTGCCATGCGGGTGGCTGCTCCA                          | 37                                 |                                           |                |
| group 7                  |                                        |       |          |                                                                |                                    |                                           |                |
|                          | * cluster                              | C5    | 33       | CCACAACCGAACTCGTAAGACGTATGTAGCCGCCAACTGT                       | 40                                 | PA#14/82                                  |                |
|                          | cluster                                | C201  | 2        | CGACAACCGAACTCGTAAGACGTATGTAGCCGCCAACTGT                       | 40                                 |                                           |                |
|                          | singleton                              | S294  | 1        | CCACAACCGAACTCGTAAGACGTATGTAGCCGCCACTTTGATTCC                  | 45                                 |                                           |                |
|                          | singleton                              | S408  | 1        | CCACAACCGAACTCGTAAGACGTATGTAGCCGCCAACTGT                       | 41                                 |                                           |                |
|                          | singleton                              | S667  | 1        | CCACAACCGAACTCATAAGACGTATGTAGCCGCCAACTGT                       | 40                                 |                                           |                |
|                          | singleton                              | S1063 | 1        | CCACAACCGAACTCGTAAGACGTATGTAGCCGCCAACTGT                       | 40                                 |                                           |                |
| group 8                  |                                        |       |          |                                                                |                                    |                                           |                |
|                          | * cluster                              | C6    | 28       | CGACAAGTGGGCATTACGATTCTAGCCCTGATTATGTTCC                       | 40                                 | PA#2/3                                    |                |
|                          | cluster                                | C68   | 5        | CGACAAGTGGGCATTACGATTCTAGCCCTGATTANGTTCC                       | 40                                 |                                           |                |
|                          | singleton                              | S343  | 1        | CGACAAGTGGGCATTACGATTCTAGCCCTGATTATGTTCC                       | 42                                 |                                           |                |
|                          | singleton                              | S347  | 1        | CGACAAGTGGGCATTACGATTCTAGCCCTGATTATGTTCC                       | 41                                 |                                           |                |
|                          | singleton                              | S363  | 1        | CGACAAGTGGGCATTACGATTCTAGCCCTGATTATGTTCC                       | 41                                 |                                           |                |
|                          | singleton                              | S375  | 1        | CGACAAGTGGGCATTACGAATCTAGCCCTGATTATGTTCC                       | 41                                 |                                           |                |
|                          | singleton                              | S611  | 1        | CGACAAGTGGGCATTATGATTCTAGCCCTGATTATGTTCC                       | 40                                 |                                           |                |
|                          | singleton                              | S1006 | 1        | CGACAAGTGTGCATTACGATTCTAGCCCTGATTATGTTCC                       | 40                                 |                                           |                |
| group 9                  |                                        |       |          |                                                                |                                    |                                           |                |
|                          | * cluster                              | C9    | 22       | ACCGAGGAGATAACGTTGTAGCCGTCCATCATCTGATTCCG                      | 40                                 | PA-C9                                     |                |
|                          | singleton                              | S446  | 1        | ACCGAGGAGATAACGTTGTAGCCGTCCATCAGTCTGATTCCG                     | 41                                 |                                           |                |
|                          | singleton                              | S751  | 1        | ACCGAGGAGATAACGTTGTAGCTGTCCATCATCTGATTCCG                      | 40                                 |                                           |                |
| group 10                 |                                        |       |          |                                                                |                                    |                                           |                |
|                          | * cluster                              | C14   | 15       | ACCGATCACTAGCCGACTAATTGGTTTCCGATCGCAGTCC                       | 40                                 | PA#2/6                                    |                |
|                          | cluster                                | C147  | 3        | ACCGATCACTAGCCGACTAATTGGTTTCCGATCGCAGTCC                       | 39                                 |                                           |                |
|                          | cluster                                | C260  | 2        | ACCGATCACTAGCCGACTAATTGGTTTCCGATTGCACTCC                       | 40                                 |                                           |                |
|                          | singleton                              | S576  | 1        | ACCGATCACTAGCCGACTAATTGGTTTCCGATCGCAGTCT                       | 40                                 |                                           |                |
|                          | singleton                              | S1289 | 1        | ACCGATCACTAGCCGACTAATTGGTTTCCGATCGCACTCC                       | 39                                 |                                           |                |
| group 11                 |                                        |       |          |                                                                |                                    |                                           |                |
|                          | * cluster                              | C11   | 19       | CGATGGAGCTGATGATTGTTGCCGATCTGACTGTTGTTCC                       | 40                                 | PA-C11                                    |                |
|                          | cluster                                | C266  | 2        | CGATGGAGCTGATGATTGTTGCCGATCTGACTGTTGTTCC                       | 39                                 |                                           |                |
|                          | singleton                              | S342  | 1        | CGATGGAGCTGATGATTGTTGCCGAGTCTGACTGTTGTTCC                      | 42                                 |                                           |                |
| group 12                 |                                        |       |          |                                                                |                                    |                                           |                |
|                          | * cluster                              | C13   | 17       | CCCCTAACGTTACTGGATGTAGTCCGACTAACTTATGCGT                       | 40                                 | PA-C13                                    |                |
|                          | singleton                              | S574  | 1        | CCCCTAACGTTACTGGATGTAGTCCGACTAACTTATGCGT                       | 40                                 |                                           |                |
|                          | singleton                              | S779  | 1        | ACCCTAACGTTACTGGATGTAGTCCGACTAACTTATGCGT                       | 40                                 |                                           |                |

| group<br>(size ≥15 seq.) | non-redundant NGS pool (1. clustering) |                      |                       | aptameric sequence (5' → 3')                                  | length of<br>intern region<br>(nt) | aptamer from<br>Sanger pool<br>identified | new<br>aptamer |
|--------------------------|----------------------------------------|----------------------|-----------------------|---------------------------------------------------------------|------------------------------------|-------------------------------------------|----------------|
|                          | cluster or<br>singleton                | name                 | no. seq.              |                                                               |                                    |                                           |                |
| group 13                 |                                        |                      |                       | ATACCAGCTTATTCAATT ---- Intern region ---- ACAATCGTAATCAGTTAG |                                    |                                           |                |
|                          | * cluster                              | C42                  | 7                     | GCAGATTACGCCTTGTAGCCCGCACTGATCTCGATGTTTGG                     | 41                                 |                                           | PA-C42         |
|                          | cluster                                | C158                 | 2                     | GCAGATTACGCCTTGTAGCCCGCACTGATCTCGANGTTTGG                     | 41                                 |                                           |                |
|                          | singleton                              | S320                 | 1                     | GCAGATTACGCCTTGTAGCCCGCACTGATCTCGATGTTTGG                     | 42                                 |                                           |                |
|                          | singleton                              | S370                 | 1                     | GCAGATTACGTCCTTGTAGCCCGCACTGATCTCGATGTTTGC                    | 41                                 |                                           |                |
|                          | singleton                              | S379                 | 1                     | GCAGATTACGTCCTTGTAGCCCGCACTGATCTCGATGTTTGG                    | 41                                 |                                           |                |
|                          | singleton                              | S385                 | 1                     | ACAGATTACGCCTTGTAGCCCGCACTGATCTCGATGTTTGG                     | 41                                 |                                           |                |
|                          | singleton                              | S394                 | 1                     | GCAGATTACGCCTTGTAGCCCGCACTGATCTCGANGTTTGC                     | 41                                 |                                           |                |
|                          | singleton                              | S413                 | 1                     | GCAGATTACGCCTTGTAGCCCGCACTGATCTCGATGTTTGC                     | 41                                 |                                           |                |
|                          | singleton                              | S431                 | 1                     | GCAGATTACGCCTTGTAGCCCGCACTGATCTCGATGTCTGG                     | 41                                 |                                           |                |
| group 14                 |                                        |                      |                       |                                                               |                                    |                                           |                |
|                          | * cluster                              | C16                  | 13                    | CCCACGAGTGTAGCCGATTCTTCTGTACTCTTGTCCTCGT                      | 40                                 |                                           | PA-C16         |
|                          | singleton                              | S291                 | 1                     | GCAGTACTGATGAGTGTAGCCGATTCTTCTGTACTCTTGTCCTCGT                | 46                                 |                                           |                |
|                          | singleton                              | S467                 | 1                     | CCCACGAGTGTAGCCGATTCTTCTGTACTCTTGTCCTCGT                      | 41                                 |                                           |                |
| group 15                 |                                        |                      |                       |                                                               |                                    |                                           |                |
|                          | * cluster                              | C15                  | 14                    | ACGTGTTGTAGCCGACCCCTGTTGATTGTTTTCCTGTACC                      | 40                                 |                                           | PA-C15         |
|                          | singleton                              | S1409                | 1                     | ACGTGTAGCCGACCCCTGTTGATTGTTTTCCTGTACC                         | 37                                 |                                           |                |
| no. groups<br>15         |                                        | no. clstr<br>60      | no. clstr seq.<br>677 |                                                               |                                    |                                           |                |
|                          |                                        | no. singleton<br>113 | no. singleton<br>113  |                                                               |                                    |                                           |                |
|                          |                                        |                      | sum seq.<br>790       |                                                               |                                    |                                           |                |

\* = representative clusters of the groups  
cluster = clustered identical sequences after the 1. clustering  
singleton = orphans after the 1. clustering
